# Supplementary material
Source: publisher site journal article supplement (https://www.dovepress.com/article/455281)
Supplement: Supplementary file 1 [file get_supplementary_file.php]

**Appendix 1:** Annotation Process

**
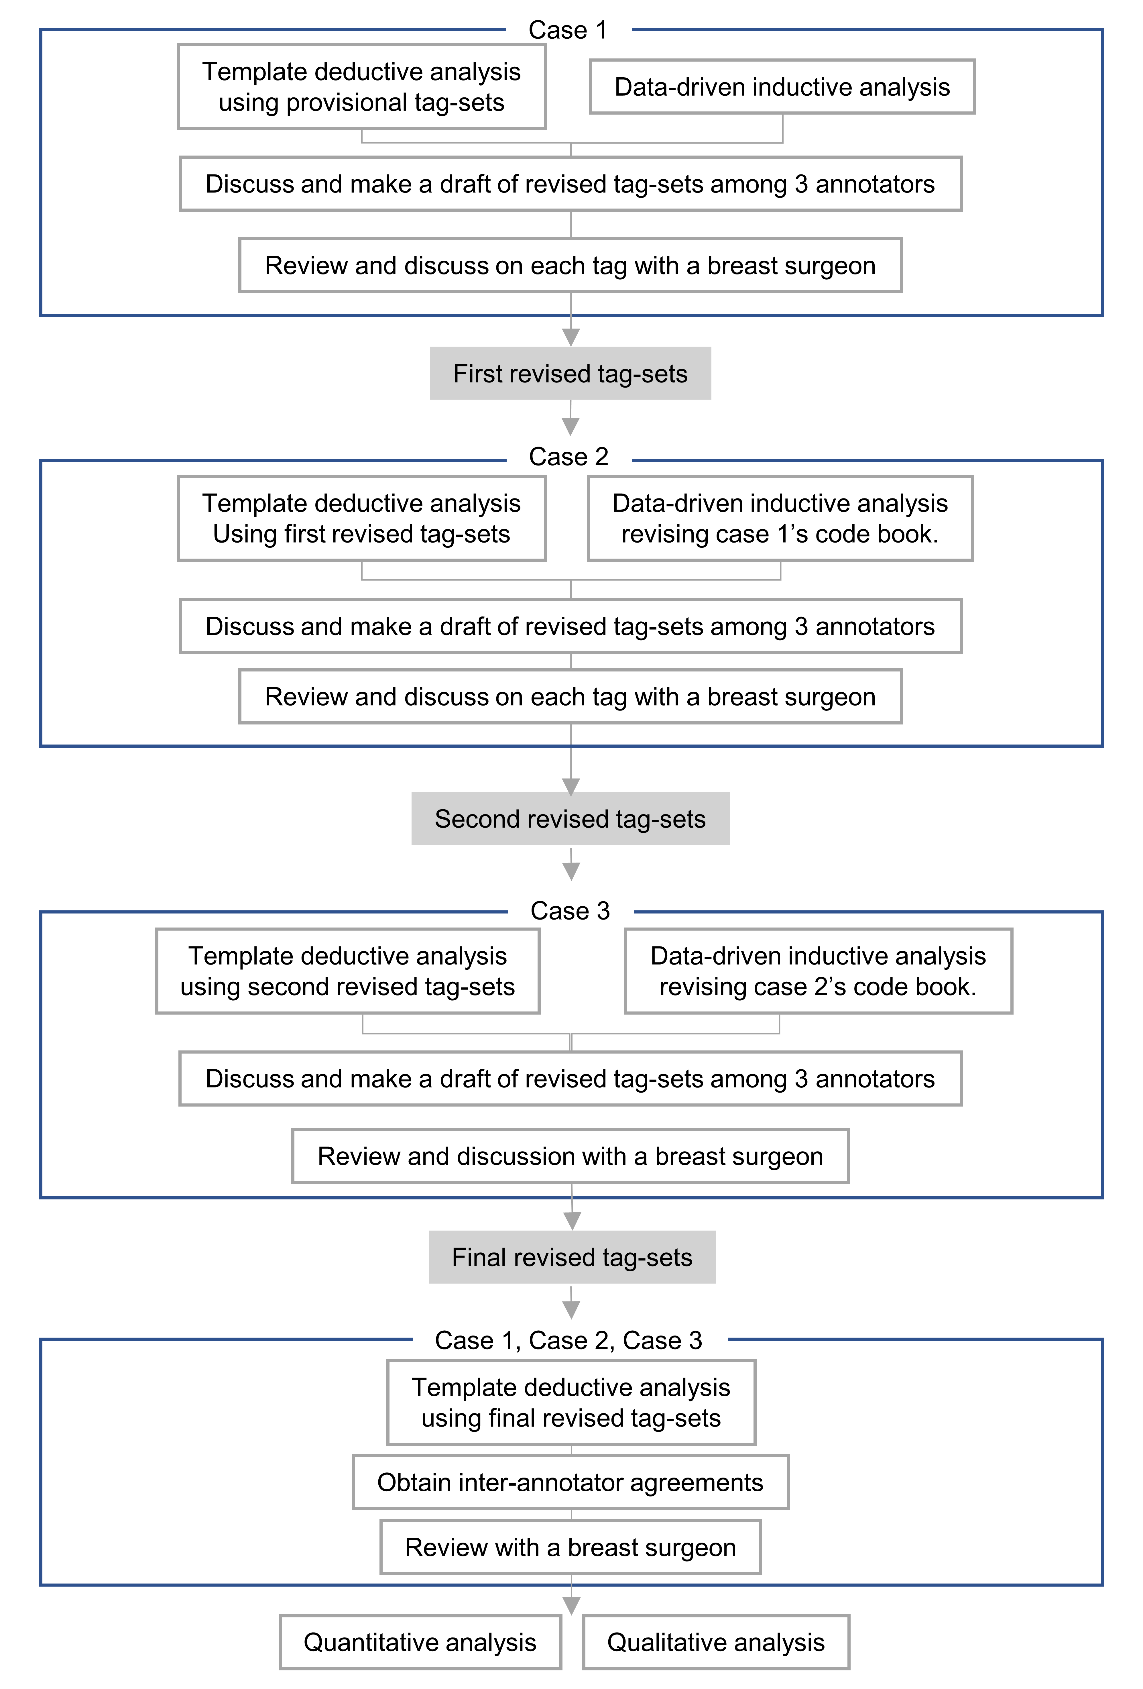
**

**Appendix 2:** Annotation Guide

| Policy |
| --- |
| Annotation is performed on a per-sentence basis. |
| One sentence is given multiple tags considering the context. |
| When a sentence is ambiguous, possible tags are given. |
| Medications are given a tag corresponding to their primary efficacy. |
| Related tags are given even if disease and symptoms that have not yet been prescribed or confirmed. |
| Suspected symptoms are given related tags even though it is denied later. |
| Informed consent is given tags which are *Medical Indication-Cancer Treatment*, *Patient Views and Preferences-Care and Treatment*, *Contextual Features-Family’s Views and Preference*. |
| After becoming best support care that is focused on managing symptoms and helping to keep patient as well as possible (no specific tumor treating options), two tags which are *Medical Indication-Cancer Treatment* and *Medical Indication-Palliative Care* are given a related sentence. |
| The tags of *Patient Views and Preferences* are given even if patient express feelings or preferences under delirium. |

**Appendix 3:** Overview of the Analyzed Data

| Medical Record Type | Case 1 | | | Case 2 | | | Case 3 | | |
| --- | --- | --- | --- | --- | --- | --- | --- | --- | --- |
| Days | Paragraphs | Sentences | Days | Paragraphs | Sentences | Days | Paragraphs | Sentences |
| Progress Note | 73 | 275 | 530 | 111 | 656 | 1822 | 289 | 1682 | 5278 |
| Consultation Note | 3 | 3 | 13 | 6 | 6 | 30 | 24 | 24 | 170 |
| Discharge Summary | 1 | 6 | 78 | 1 | 5 | 66 | 5 | 28 | 480 |
| Discharge Summary of Nurse | 1 | 5 | 58 | 1 | 4 | 54 | 5 | 23 | 393 |
| Discharge Support Screening Sheet | 0 | 0 | 0 | 0 | 0 | 0 | 2 | 6 | 37 |
| Discharge Conference Note | 0 | 0 | 0 | 0 | 0 | 0 | 5 | 15 | 99 |
| SOAP and Focus charting | 13 | 38 | 91 | 46 | 148 | 374 | 152 | 843 | 2730 |
| Nursing Charting | 1 | 11 | 35 | 0 | 0 | 0 | 2 | 31 | 96 |
| Nursing Note | 0 | 0 | 0 | 4 | 6 | 18 | 8 | 12 | 49 |
| Paramedical Note | 1 | 1 | 1 | 1 | 1 | 3 | 9 | 9 | 207 |
| IC Attending Note | 1 | 6 | 13 | 1 | 6 | 21 | 0 | 0 | 0 |
| ER Charting | 0 | 0 | 0 | 1 | 15 | 72 | 2 | 24 | 229 |
| Pain Assessment Template for Nurse | 1 | 3 | 16 | 1 | 3 | 18 | 6 | 17 | 121 |
| Medication Management Assessment | 2 | 4 | 11 | 1 | 2 | 8 | 11 | 22 | 82 |
| Illness and Life Questionnaire | 1 | 6 | 6 | 0 | 0 | 0 | 0 | 0 | 0 |
| Fall Risk Assessment | 2 | 6 | 55 | 2 | 6 | 65 | 8 | 24 | 252 |
| Nutrition Counseling Note | 0 | 0 | 0 | 24 | 46 | 276 | 0 | 0 | 0 |
| First Visit and Admission Note | 2 | 4 | 15 | 0 | 0 | 0 | 4 | 11 | 93 |
| Medical Interview Note | 1 | 2 | 8 | 0 | 0 | 0 | 1 | 2 | 17 |
| Liaison Support and Patient Advice Note | 0 | 0 | 0 | 2 | 4 | 30 | 5 | 10 | 75 |
| Total | 103 | 370 | 930 | 202 | 908 | 2857 | 538 | 2783 | 10408 |

**Abbreviations:** SOAP, subjective objective assessment and plan; IC, informed consent; ER, emergency room

**Appendix 4:** Tag List and Definition

| Category | | Tag Title | Definition |
| --- | --- | --- | --- |
| BMI | Medical Indication | Cancer Treatment | Items related to therapies, cares, and tests for cancer treatment |
| Pathology | Items related to a pathology |
| Recurrent and Metastasis | Items related to a recurrent and metastasis |
| Lymph Node Metastasis | Items related to a lymph node metastasis |
| Subtype | Items related to a breast cancer subtype |
| Complication | Unsuspected medical conditions that arise during the treatment |
| Comorbidity | Diseases other than breast cancer |
| Palliative Care | Items related to palliative cares |
| Clinical Study | Items related to clinical studies |
| Genetics | Genetic items |
| Others | Items other than the above in Medical Indication |
| QOL-Physical Status | General Condition | Status of general condition including patient performance states |
| Pain | Items related to pains and swellings |
| Fever | Items related to fevers |
| Respiratory | Items related to respiratory symptoms |
| Numb | Items related to numb |
| Lymphedema | Items related to lymphedema |
| Menstruation and Menopause-like | Items related to a menstruation and menopause-like symptoms |
| Skin Trouble | Items related to skin troubles |
| Dental | Items related to dental |
| Urination and Defecation | Items related to urinations and defecations |
| Appetite and Dietary Intake | Items related to appetite, nutrition and dietary intake |
| Sleep and Sleepiness | Items related to a sleep and sleepiness |
| Nausea and Vomiting | Items related to nausea and vomiting |
| Fatigue and Tiredness | Items related to fatigue and tiredness |
| Others | Items other than the above in Physical Status |
| PCI | QOL-Concern of Daily Life-Care-Treatment | Palliative Care | Concern of palliative care |
| Appearance | Concern of appearance including surgery type (lumpectomy, mastectomy and reconstruction) |
| Visit and Admission | Concern of hospital visit and admission |
| Job | Concern of job |
| Economy and Social Service | Concern of economy and social service |
| Family | Concern of family |
| Daily Life | Concern of daily life |
| Symptoms, Care and Treatment | Concern of symptoms, care and treatment |
| Others | Items other than the above in Concern of Daily Life-Care-Treatment |
| QOL-State of Mind | Feelings | Emotional state or reaction |
| Difficulty of Life | Difficulty of daily life due to feelings down or mental status |
| Others | Clinically significant disturbance in a cognition, emotional regulation, or behavior |
| Mental Disorder | Items other than the above in State of Mind |
| Patient Views and Preferences | Care and Treatment | Patient’s views and preferences on cares and treatments |
| Visit and Admission | Patient’s views and preferences on hospital visits and admissions |
| Appearance | Patient’s views and preferences on her appearance including a surgery type (lumpectomy, mastectomy, and reconstruction) |
| Terminal Prognosis | Patient’s views and preferences on a terminal prognosis. Prognosis awareness. |
| Palliative Care | Patient’s views and preferences on palliative cares |
| Clinical Study | Patient’s views and preferences on clinical studies |
| Others | Items other than the above in Patient Views and Preferences |
| Contextual Features | Family | Items related to the family |
| Family’s Views and Preference | Family’s Views and Preference concerning all things |
| Visit and Admission | Items related to hospital visits and admissions |
| Hobby and Habits | Items related to hobbies and habits |
| Daily Life | Items related to daily life, events, patient’s situations, and behaviors at home |
| Job and Economy | Items related to patient’s and family’s jobs, and economic situations |
| Social Service | Items related to social services |
| Others | Items other than the above in Contextual Features |

**Abbreviations:** BMI = Biomedical Information, PCI = Patient-Centered Information, QOL = quality of life.

**Appendix 5:** Difference the Number of Tag Between Physicians and the Nurse at the Same Informed Consent Meeting

| Category | | | Number of Given Tags | |
| --- | --- | --- | --- | --- |
| Progress Note | IC Attending Note |
| BMI | Medical Indication | Cancer Treatment | 6 | 4 |
| Palliative Care | 7 | 6 |
| QOL-Physical Status | Pain | 5 | 0 |
| General Condition | 0 | 1 |
| PCI | QOL-Concern of Daily Life-Care-Treatment | Family | 0 | 1 |
| Patient Views and Preferences | Care and Treatment | 0 | 1 |
| Visit and Admission | 0 | 1 |
| Palliative Care | 0 | 3 |
| Contextual Features | Family | 1 | 7 |
| Family's Views and Preferences | 2 | 10 |
| Life | 0 | 1 |
| Social Service | 1 | 2 |
| Visit and Admission | 1 | 2 |
| Others | 1 | 0 |
| Total | | | 24 | 39 |
| BMI (%) | | | 18 (75) | 11 (28) |
| PCI (%) | | | 6 (25) | 28 (72) |

**Note:** Biomedical information consisted of *Medical Indication* and *Physical Status.* The others designated patient-centered information. Of the 54 tags, only those assigned to the *Progress Note* or the *IC Attending Note* in this case were listed.

**Abbreviations:** BMI = Biomedical Information, PCI = Patient-Centered Information, QOL = Quality of Life
